# Supplementary material
Source: PubMed Central journal article supplement (PMC4837008)
Supplement: NIHMS770857-supplement-01.pdf [file NIHMS770857-supplement-01.pdf]

| A             | 6 month IDEAL score, pts  |                          |                          |                            |                            |                           |                |
|---------------|---------------------------|--------------------------|--------------------------|----------------------------|----------------------------|---------------------------|----------------|
|               | Baseline IDEAL score, pts | 1                        | 2                        | 3                          | 4                          | 5                         | 6              |
| 1             | 1<br>(0.3)                | <b>2</b><br><b>(0.6)</b> | <b>3</b><br><b>(0.9)</b> | <b>4</b><br><b>(1.2)</b>   | <b>0</b><br><b>(0)</b>     | <b>0</b><br><b>(0)</b>    | 10<br>(3.0)    |
| 2             | 0<br>(0)                  | 6<br>(1.8)               | <b>6</b><br><b>(1.8)</b> | <b>25</b><br><b>(7.5)</b>  | <b>9</b><br><b>(2.7)</b>   | <b>5</b><br><b>(1.5)</b>  | 51<br>(15.2)   |
| 3             | 0<br>(0)                  | 4<br>(1.2)               | 19<br>(5.7)              | <b>39</b><br><b>(11.6)</b> | <b>32</b><br><b>(9.6)</b>  | <b>6</b><br><b>(1.8)</b>  | 100<br>(29.9)  |
| 4             | 0<br>(0)                  | 1<br>(0.3)               | 11<br>(3.3)              | 47<br>(14.0)               | <b>54</b><br><b>(16.1)</b> | <b>18</b><br><b>(5.4)</b> | 131<br>(39.1)  |
| 5             | 0<br>(0)                  | 0<br>(0)                 | 0<br>(0)                 | 6<br>(1.8)                 | 25<br>(7.5)                | <b>12</b><br><b>(3.6)</b> | 43<br>(12.8)   |
| 6             | 0<br>(0)                  | 0<br>(0)                 | 0<br>(0)                 | 0<br>(0)                   | 0<br>(0)                   | 0<br>(0)                  | 0<br>(0)       |
| 6 month Total | 1<br>(0.3)                | 13<br>(3.9)              | 39<br>(11.6)             | 121<br>(36.1)              | 120<br>(35.8)              | 41<br>(12.2)              | 335<br>(100.0) |

| B             | 6 month FR-10, %          |             |                |
|---------------|---------------------------|-------------|----------------|
|               | Baseline FR-10 risk, %    | <1%         | ≥1%            |
| <1%           | 289<br>(86.3)             | 6<br>(1.8)  | 295<br>(88.1)  |
| ≥1%           | <b>25</b><br><b>(7.5)</b> | 15<br>(4.5) | 40<br>(11.9)   |
| 6 month Total | 314<br>(93.7)             | 19<br>(5.7) | 335<br>(100.0) |

**Supplemental Table.** Cross-tabulations [n (%)] of baseline and 6-month distributions of (A) American Heart Association Ideal Cardiovascular Health (IDEAL) Score (*higher score is better*) and (B) the 10-year risk of coronary heart disease (%) as predicted by the Framingham Risk equation (FR-10) (*lower % is better*) in 335 overweight and obese young adults enrolled in a behavioral weight loss intervention. Diagonal cells represent no change and bolded cells represent improvement. The IDEAL score and FR-10 improved significantly from baseline to 6 months (p for both<0.001).
