# Supplementary material
Source: PubMed Central journal article supplement (PMC4837008)
Supplement: NIHMS770857-supplement-02.pdf [file NIHMS770857-supplement-02.pdf]

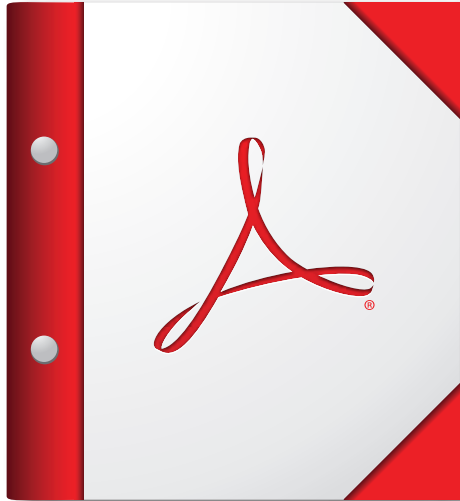

**For the best experience, open this PDF portfolio in  
Acrobat 9 or Adobe Reader 9, or later.**

[Get Adobe Reader Now!](#)
